# Supplementary material
Source: Springer Nature journal article supplement (https://www.springermedizin.de/resource/supplementary/12885_2013_4212_MOESM4_ESM.pdf/9465792)
Supplement: MOESM4 [file 9465792]

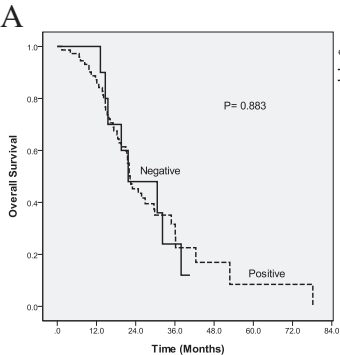

No. at risk

|     |    |    |    |   |   |   |   |
|-----|----|----|----|---|---|---|---|
| Neg | 10 | 10 | 4  | 2 |   |   |   |
| Pos | 73 | 58 | 26 | 8 | 3 | 1 | 1 |

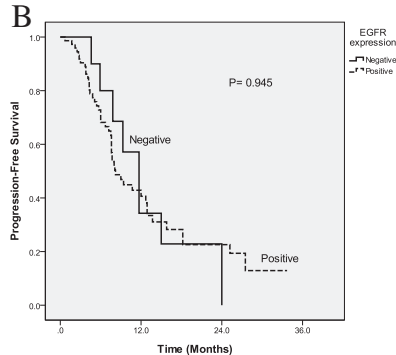

No. at risk

|      |    |    |   |
|------|----|----|---|
| Neg  | 10 | 3  | 1 |
| Posi | 73 | 19 | 7 |

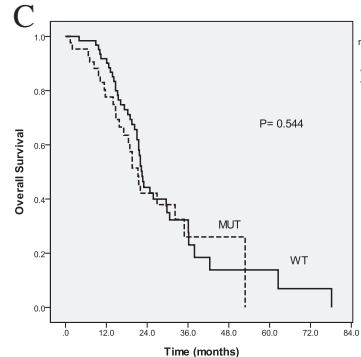

No. at risk

|     |    |    |    |   |   |   |   |
|-----|----|----|----|---|---|---|---|
| WT  | 63 | 55 | 21 | 7 | 3 | 2 | 1 |
| MUT | 44 | 29 | 12 | 4 | 1 |   |   |

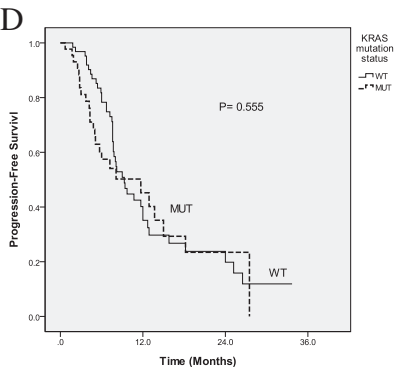

No. at risk

|     |    |    |   |
|-----|----|----|---|
| WT  | 63 | 16 | 6 |
| MUT | 44 | 9  | 3 |

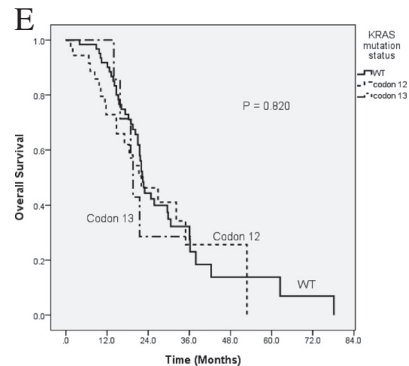

No. at risk

|          |    |    |    |   |   |   |   |
|----------|----|----|----|---|---|---|---|
| WT       | 63 | 55 | 19 | 7 | 3 | 2 | 1 |
| Codon 12 | 37 | 22 | 11 | 3 | 1 |   |   |
| Codon 13 | 7  | 7  | 1  | 1 |   |   |   |

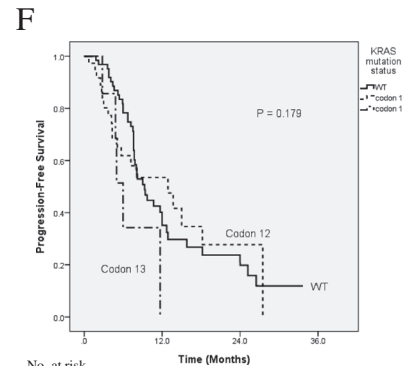

No. at risk

|          |    |    |   |
|----------|----|----|---|
| WT       | 63 | 16 | 6 |
| Codon 12 | 37 | 9  | 3 |
| Codon 13 | 7  |    |   |
